# Supplementary material for: Astrocytes mediate two forms of spike timing-dependent depression at entorhinal cortex-hippocampal synapses
Source: eLife. 2024 Nov 14;13:RP98031. doi: 10.7554/eLife.98031 (PMC11563576; doi:10.7554/eLife.98031)
Supplement: Figure 1—figure supplement 1—source data 1. [file elife-98031-fig1-figsupp1-data1.xlsx]

## Sheet: Figure 1-figure supplement 1
Supplementary 1 (b) LPP-GC				Supplementary 1 (d) MPP-GC
t-LTD	Bicu + SCH			t-LTD	Bicu + SCH
59.9007	69.8463			61.9345	42.9017
72.7977	72.2292			93.2004	106.161
42.104	91.1642			41.2767	70.5832
80.9759	102.584			80.4672	73.0458
73.2269	36.0038			49.438	62.3069
71.4316	40.4289			61.9345	93.16
60.3815				60.3815
61.9345				61.9345
53.4511				53.4511
