# Supplementary material for: Astrocytes mediate two forms of spike timing-dependent depression at entorhinal cortex-hippocampal synapses
Source: eLife. 2024 Nov 14;13:RP98031. doi: 10.7554/eLife.98031 (PMC11563576; doi:10.7554/eLife.98031)
Supplement: Figure 1—source data 1. [file elife-98031-fig1-data1.xlsx]

## Sheet: Figure 1
Figure 1 (c) LPP-GC			Figure 1 (m) MPP-GC			Figure 1 (d) Failures LPP-GC				Figure 1 (n) Failures MPP-GC				Figure 1 (e) PPF LPP-GC			Figure 1 (o) PPF MPP-GC			Figure 1 (h) Frequency LPP-GC				Figure 1 (r) Frequency MPP-GC				Figure 1 (j) Amplitude LPP-GC				Figure 1 (t) Amplitude MPP-GC
Paired	Unpaired		Paired	Unpaired		Baseline	t-LTD			Baseline	t-LTD			Baseline	t-LTD		Baseline	t-LTD		Baseline	t-LTD			Baseline	t-LTD			Baseline	t-LTD			Baseline	t-LTD
68.8849	103.892		45.447	101.611		23.3333	60			38.3333	43.3333			0.774186	2.78547		0.987709	1.03299		1.37778	0.733333			1.08889	1.04444			0.975245	1.14505			0.910689	1.06438
82.3558	96.6844		61.9345	95.2923		19.1667	48.3333			53.3333	67.5			1.12412	1.09269		1.25804	1.291		1.92222	0.955556			1.06667	0.555556			0.958934	1.08653			1.10792	1.26187
73.2269	94.5383		63.1457	90.9936		50.8333	88.3333			25	69.1667			1.11666	2.20214		1.02652	1.28325		1.43333	0.522222			1.17778	0.888889			1.05377	1.17492			1.19727	1.28447
71.4316	96.0065		80.4672	108.633		36.6667	73.3333			53.3333	62.5			1.36436	1.20108		0.811438	1.87272		1.42222	0.655556			1.17778	0.888889			1.32721	1.07113			0.747591	0.759072
53.4511	119.54		58.3537	121.537		60.8333	74.1667			45	63.3333			0.66078	1.00967		1.45858	0.82334		1.67778	1.12222			1.27778	0.555556			1.37798	1.1988			1.18144	0.840523
78.6338	104.342		83.486	111.923		71.6667	77.5			25.8333	46.6667			1.26655	1.87242		0.372989	1.39243		0.933333	0.655556			1.38889	0.511111							1.05501	0.803913
						57.5	93.3333							1.88648	2.66673		0.578046	0.670647						1.56667	0.766667
						26.6667	95							2.2384	2.72995		1.32664	1.88819						0.922222	0.477778
														1.024	1.13452		0.872978	2.46525						1.82222	0.9
														0.832505	1.01461		1.04424	1.04157
														1.23379	1.54168		1.43396	1.89204
														1.17247	1.41055		1.16007	1.23146
														0.972584	0.812149		1.03209	1.85199
														0.715827	0.85428		1.60025	2.48427
														1.03992	2.1482		1.40702	1.0822
																	1.22133	1.60835
																	1.47245	2.05684
																	1.99023	2.7234
																	1.10278	2.1733

## Sheet: Figure 2
Figure 2 (b) LPP-GC				Figure 2 (d) LPP-GC					Figure 2 (f) MPP-GC					Figure 2 (h) MPP-GC
t-LTD	D-AP5	MK-801		t-LTD	LY341495	LY367385	MPEP		t-LTD	D-AP5	MK-801	pMK-801		t-LTD	LY341495	LY367385	MPEP
44.2046	58.6992	50.2131		25.8904	60.455	64.4057	90.7695		77.5216	60.8936	127.397	56.6765		49.438	89.7922	120.195	43.1034
48.8729	75.568	45.447		86.0075	149.745	76.5139	108.178		89.212	90.9525	80.4672	41.3474		45.447	60.1266	108.368	65.4542
33.0514	75.4937	86.9532		82.3558	119.805	78.9361	91.2821		28.3122	131.302	100.337	58.9966		61.9345	121.585	87.0007	42.2221
77.0086	67.3837	91.1931		83.1883	100.652	74.989	149.589		38.5138	101.616	145.5	59.9448		63.1457	130.566	78.0847	87.793
48.7631	59.4095	62.1873		71.4316	63.2485	72.8204	97.924		68.8872	79.7599	104.402	43.3478		80.4672	71.8591	71.4038	67.9659
69.566	83.2381	35.1267		53.4511	106.726	86.7787	46.8886		59.7545	78.2628	86.5681	58.3537		58.3537	72.1873	89.0287	57.1827
83.1883	43.1413			78.6338	112.091		123.873		63.1457	75.1779		57.6465		95.4501	77.8297	110.753
71.4316	63.1457			77.0086	86.0234		110.413		58.3537	73.838		19.3945		89.212	146.193
				56.4331						85.255		93.3454		38.5138	104.366
										125.152					117.414

## Sheet: Figure 3
Figure 3 (b) LPP-GC						Figure 3 (d) LPP-GC					Figure 3 (f) MPP-GC						Figure 3 (h) MPP-GC
t-LTD	Nimodipine	Heparin	pThapsigargin	Ruthenium Red		t-LTD	pTHL	AM251p20	WIN		t-LTD	Nimodipine	Heparin	pThapsigargin	Ruthenium Red		t-LTD	pTHL	AM251p20	AM251p13	WIN
53.4511	77.9848	44.4959	133.118	69.949		69.566	77.4902	91.7601	73.7057		80.4672	75.035	115.454	76.9702	145.315		60.8498	74.989	94.0519	86.0075	68.2219
62.5106	79.7346	80.7926	96.9484	118.918		83.1883	76.6916	63.3921	79.5974		69.1803	60.3445	87.8943	94.4611	87.6479		80.4672	90.7695	116.824	73.2269	77.7035
93.6683	61.2975	67.0802	102.861	94.8511		73.2269	75.2223	93.7425	87.0738		51.1478	40.0095	51.3791	113.29	98.4326		58.3537	78.9361	106.845	71.4316	76.1797
83.7421	83.478	104.492	114.494	76.0467		61.4483	74.5777	119.565	84.5162		90.8112	65.9678	97.6515	87.2397	86.7875		76.5647	109.775	98.4361	73.7329	84.2751
38.0025	79.8748	76.1307	80.8161	157.981		64.0488	89.1379	68.6457	86.3395		67.9832	77.2903	70.888	87.7712	59.2792		80.4672	98.7551	94.6086	65.1731	93.3784
90.922	90.2449	87.2397	85.9661	77.6014		68.8849	111.413	85.8397	66.0055		58.0318	81.5941	62.0288	94.1441	109.004		49.438	97.4298	77.4081	48.1769	76.4673
56.4857			78.1726	91.7555		48.7631	126.436	82.8955			30.6656			83.54			80.4672
44.2046			103.792			71.4316	102.824	151.443			93.2004			83.6142			45.447
68.8849			65.1485			68.4908		120.131			49.438			101.793
62.0288			80.8082					94.6131			62.0288			126.577
62.3069			114.613					133.051			41.8937			105.055
			179.271					128.326						123.01
			111.457					88.6953						102.83
			124.18					101.851
			130.817
