# Supplementary material for: Astrocytes mediate two forms of spike timing-dependent depression at entorhinal cortex-hippocampal synapses
Source: eLife. 2024 Nov 14;13:RP98031. doi: 10.7554/eLife.98031 (PMC11563576; doi:10.7554/eLife.98031)
Supplement: Figure 2—source data 1. [file elife-98031-fig2-data1.xlsx]

## Sheet: Figure 2
Figure 2 (b) LPP-GC				Figure 2 (d) LPP-GC					Figure 2 (f) MPP-GC					Figure 2 (h) MPP-GC
t-LTD	D-AP5	MK-801		t-LTD	LY341495	LY367385	MPEP		t-LTD	D-AP5	MK-801	pMK-801		t-LTD	LY341495	LY367385	MPEP
44.2046	58.6992	50.2131		25.8904	60.455	64.4057	90.7695		77.5216	60.8936	127.397	56.6765		49.438	89.7922	120.195	43.1034
48.8729	75.568	45.447		86.0075	149.745	76.5139	108.178		89.212	90.9525	80.4672	41.3474		45.447	60.1266	108.368	65.4542
33.0514	75.4937	86.9532		82.3558	119.805	78.9361	91.2821		28.3122	131.302	100.337	58.9966		61.9345	121.585	87.0007	42.2221
77.0086	67.3837	91.1931		83.1883	100.652	74.989	149.589		38.5138	101.616	145.5	59.9448		63.1457	130.566	78.0847	87.793
48.7631	59.4095	62.1873		71.4316	63.2485	72.8204	97.924		68.8872	79.7599	104.402	43.3478		80.4672	71.8591	71.4038	67.9659
69.566	83.2381	35.1267		53.4511	106.726	86.7787	46.8886		59.7545	78.2628	86.5681	58.3537		58.3537	72.1873	89.0287	57.1827
83.1883	43.1413			78.6338	112.091		123.873		63.1457	75.1779		57.6465		95.4501	77.8297	110.753
71.4316	63.1457			77.0086	86.0234		110.413		58.3537	73.838		19.3945		89.212	146.193
				56.4331						85.255		93.3454		38.5138	104.366
										125.152					117.414
