# Supplementary material for: Astrocytes mediate two forms of spike timing-dependent depression at entorhinal cortex-hippocampal synapses
Source: eLife. 2024 Nov 14;13:RP98031. doi: 10.7554/eLife.98031 (PMC11563576; doi:10.7554/eLife.98031)
Supplement: Figure 3—figure supplement 1—source data 1. [file elife-98031-fig3-figsupp1-data1.xlsx]

## Sheet: Figure 3-figure supplement 1
Supplementary 2 (b) LPP-GC				Supplementary 2 (d) MPP-GC
t-LTD	FK506	pFK506		t-LTD	FK506
83.1883	105.356	86.9532		80.4672	50.335
71.4316	91.9094	146.642		95.4501	84.1552
53.4511	105.611	92.7294		49.438	93.0879
25.8904	103.055	78.0293		63.1457	66.526
78.6338	119.126	76.9221		80.4672	80.1664
77.0086	151.443	127.209		58.3537	56.1589
74.354	88.7934	129.384
68.8849	111.802	97.7715
82.3558		125.712
		78.8019
		166.558
		105.042
		112.038
