# Supplementary material for: Astrocytes mediate two forms of spike timing-dependent depression at entorhinal cortex-hippocampal synapses
Source: eLife. 2024 Nov 14;13:RP98031. doi: 10.7554/eLife.98031 (PMC11563576; doi:10.7554/eLife.98031)
Supplement: Figure 3—source data 1. [file elife-98031-fig3-data1.xlsx]

## Sheet: Figure 3
Figure 3 (b) LPP-GC						Figure 3 (d) LPP-GC					Figure 3 (f) MPP-GC						Figure 3 (h) MPP-GC
t-LTD	Nimodipine	Heparin	pThapsigargin	Ruthenium Red		t-LTD	pTHL	AM251p20	WIN		t-LTD	Nimodipine	Heparin	pThapsigargin	Ruthenium Red		t-LTD	pTHL	AM251p20	AM251p13	WIN
53.4511	77.9848	44.4959	133.118	69.949		69.566	77.4902	91.7601	73.7057		80.4672	75.035	115.454	76.9702	145.315		60.8498	74.989	94.0519	86.0075	68.2219
62.5106	79.7346	80.7926	96.9484	118.918		83.1883	76.6916	63.3921	79.5974		69.1803	60.3445	87.8943	94.4611	87.6479		80.4672	90.7695	116.824	73.2269	77.7035
93.6683	61.2975	67.0802	102.861	94.8511		73.2269	75.2223	93.7425	87.0738		51.1478	40.0095	51.3791	113.29	98.4326		58.3537	78.9361	106.845	71.4316	76.1797
83.7421	83.478	104.492	114.494	76.0467		61.4483	74.5777	119.565	84.5162		90.8112	65.9678	97.6515	87.2397	86.7875		76.5647	109.775	98.4361	73.7329	84.2751
38.0025	79.8748	76.1307	80.8161	157.981		64.0488	89.1379	68.6457	86.3395		67.9832	77.2903	70.888	87.7712	59.2792		80.4672	98.7551	94.6086	65.1731	93.3784
90.922	90.2449	87.2397	85.9661	77.6014		68.8849	111.413	85.8397	66.0055		58.0318	81.5941	62.0288	94.1441	109.004		49.438	97.4298	77.4081	48.1769	76.4673
56.4857			78.1726	91.7555		48.7631	126.436	82.8955			30.6656			83.54			80.4672
44.2046			103.792			71.4316	102.824	151.443			93.2004			83.6142			45.447
68.8849			65.1485			68.4908		120.131			49.438			101.793
62.0288			80.8082					94.6131			62.0288			126.577
62.3069			114.613					133.051			41.8937			105.055
			179.271					128.326						123.01
			111.457					88.6953						102.83
			124.18					101.851
			130.817
