# Supplementary material for: Astrocytes mediate two forms of spike timing-dependent depression at entorhinal cortex-hippocampal synapses
Source: eLife. 2024 Nov 14;13:RP98031. doi: 10.7554/eLife.98031 (PMC11563576; doi:10.7554/eLife.98031)
Supplement: Figure 4—source data 1. [file elife-98031-fig4-data1.xlsx]

## Sheet: Figure 4
Figure 4 (c) LPP-GC					Figure 4 (e) LPP-GC					Figure 4 (h) MPP-GC					Figure 4 (j) MPP-GC
t-LTD	aBAPTA	dn-Snare	TeTxLC		t-LTD	dnSnare	evans blue	dnSnare+glut		t-LTD	aBAPTA	dnsnare	TeTxLC		t-LTD	dnSnare	evans blue	dnSnare+glut
74.8591	96.8458	103.599	78.8945		101.928	103.599	119.46	77.3355		76.4234	88.178	107.095	106.349		49.438	107.095	126.932	56.3733
50.0653	136.413	110.383	90.4611		62.5106	110.383	119.046	33.1528		61.9345	113.359	98.6571	135.757		77.5216	98.6571	92.1487	80.8156
82.3581	75.8309	99.7377	140.477		44.9388	94.5019	95.5267	95.8463		51.4116	103.115	120.692	126.932		63.1457	120.692	140.477	55.6643
81.5778	86.2573	88.0138	116.883		80.4406	108.578	102.14	105.12		38.845	93.0279	84.1967	92.1487		80.4672	84.1967	121.422	57.8373
83.1779	105.71	163.696	92.1487		56.4857	80.8161	115.023	74.882		72.241	69.4803	131.243	121.422		45.447	123.37	66.9702	105.042
66.0831	116.815	108.578	118.021		45.2328	74.3889	86.8531	46.7939		60.3815	95.3299	123.37	66.9702		72.241	121.537	90.4611	58.2034
60.6457		80.8161			44.2046	88.3573				63.1457		121.537			60.3815
70.6316		74.3889			73.2269					83.486					61.9345
		88.3573			53.4511					53.4511					53.4511
